# Supplementary material for: Major Role of S-Glycoprotein in Providing Immunogenicity and Protective Immunity in mRNA Lipid Nanoparticle Vaccines Based on SARS-CoV-2 Structural Proteins
Source: MDPI journal article supplement (doi:10.3390/vaccines12040379), 2024-04-02
Supplement: s1 [file s1]

## SUPPLEMENTARY

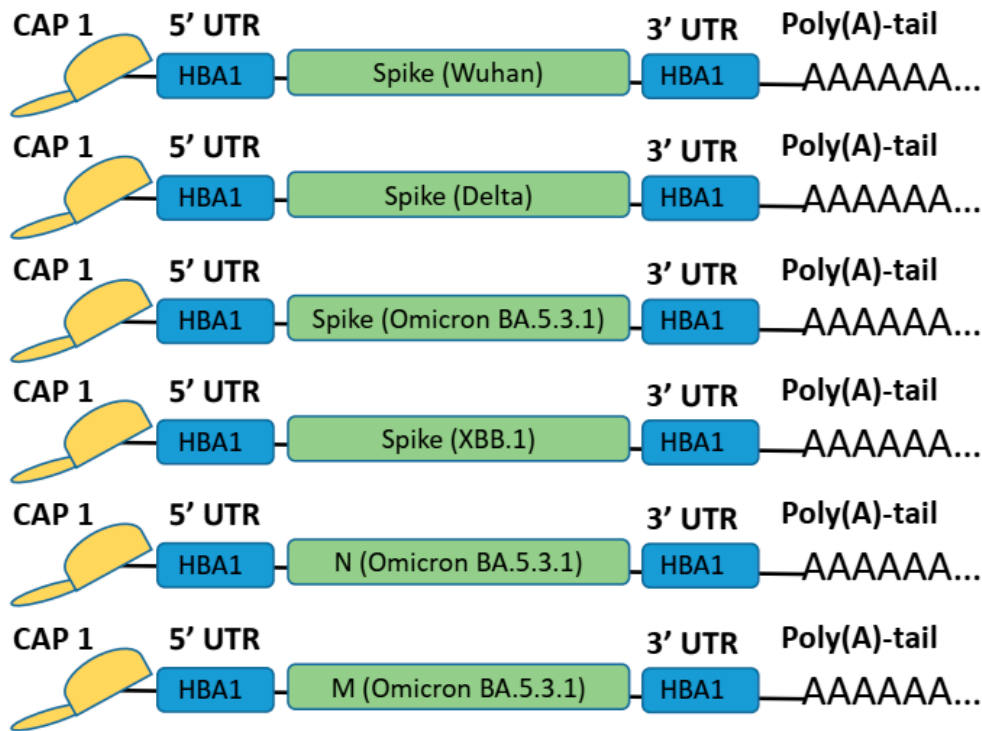

**Figure S1. Schematic representation of mRNAs, encoding SARS-CoV-2 structural proteins using in this study.**

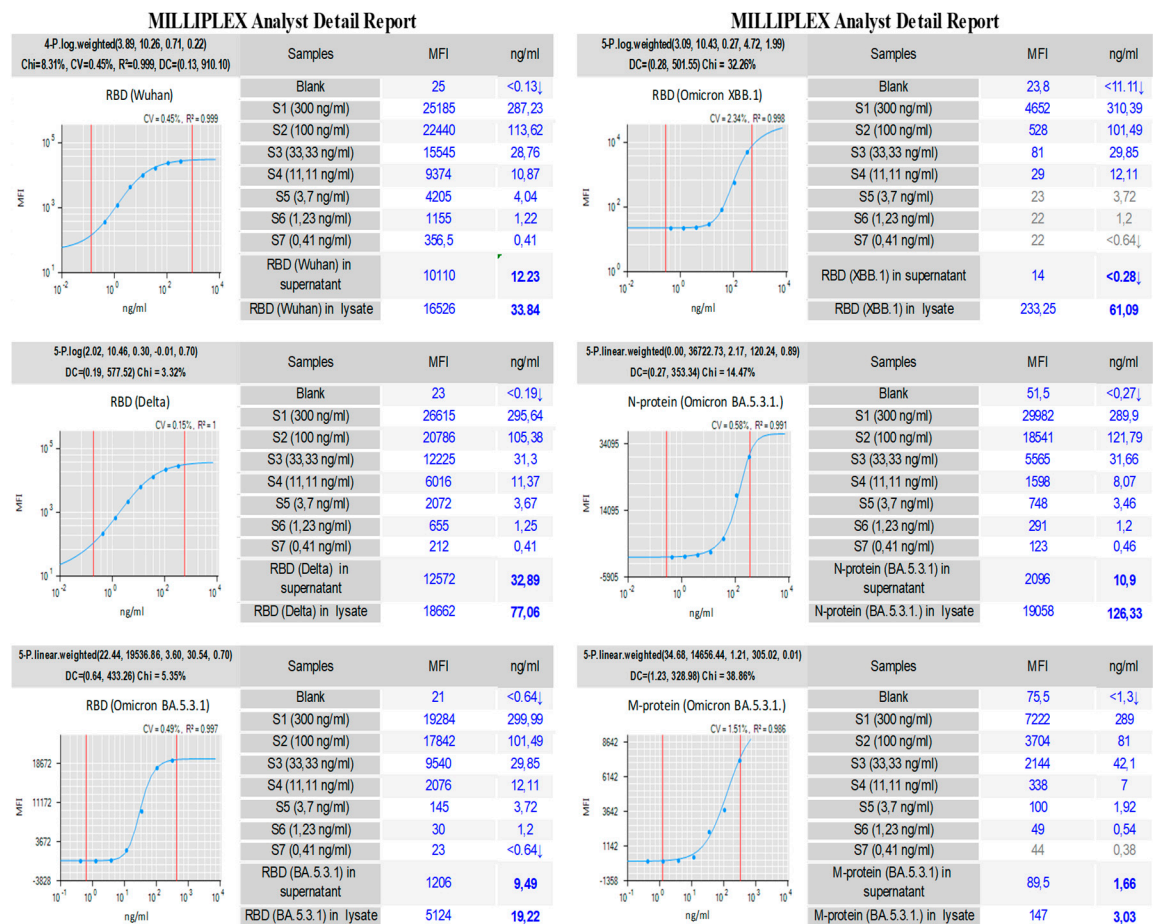

**Figure S2. mRNAs translation check on HEK293T cells.** Bead based immunoassay results. Median fluorescent intensity (MFI) was measured on a MAGPIX instrument and converted in ng/ml. For each identified analyte (RBD, N or M), the MFI-value was converted to ng/mL by interpolation from a 5-parameter logistic (5-PL) curve of reference standard using the MILLIPLEX® Analyst 5.1 software (The Life Science/Merck KGaA).

**Table S1.** Physicochemical properties of mRNA-LNP formulations.

| mRNA-S-LNP |       |        |       |       |            |       |        |       |            |       |        |       |
|------------|-------|--------|-------|-------|------------|-------|--------|-------|------------|-------|--------|-------|
| d (nm)     | PDI   | Z (mV) | E%    |       |            |       |        |       |            |       |        |       |
| 76         | 0,128 | -8     | 92    |       |            |       |        |       |            |       |        |       |
| 76         | 0,093 | -6     | 83    |       |            |       |        |       |            |       |        |       |
| 73         | 0,108 | -8     | 84    |       |            |       |        |       |            |       |        |       |
| 78         | 0,146 | -8     | 92    |       |            |       |        |       |            |       |        |       |
| 74         | 0,121 | -8     | 92    |       | mRNA-N-LNP |       |        |       | mRNA-M-LNP |       |        |       |
| d (nm)     | PDI   | Z (mV) | E%    |       | d (nm)     | PDI   | Z (mV) | E%    | d (nm)     | PDI   | Z (mV) | E%    |
| 80         | 0,112 | -7     | 89    |       | 70         | 0,104 | -7     | 91    | 68         | 0,14  | -8     | 92    |
| 73         | 0,111 | -8     | 88    |       | 79         | 0,148 | -8     | 82    | 70         | 0,13  | -5     | 90    |
| 78         | 0,102 | -9     | 84    |       |            |       |        |       |            |       |        |       |
| Mean       | 76    | 0,115  | -8    | 88    | 75         | 0,126 | -8     | 86    | 69         | 0,135 | -7     | 91    |
| SD         | 2,563 | 0,016  | 0,886 | 3,891 | 6,364      | 0,031 | 0,707  | 4,583 | 1,414      | 0,007 | 2,121  | 1,414 |
| Median     | 76    | 0,112  | -8    | 89    | 75         | 0,126 | -8     | 85    | 69         | 0,135 | -7     | 91    |

The diameter (d) and polydispersity index (PDI) and Zeta potential (Z) of the mRNA-LNP formulations were measured by dynamic light scattering (for d and PDI values) or by determining the electrophoretic mobility (for Z) using a Zetasizer Nano ZS instrument (Malvern Panalytical). E% – encapsulation efficiency of mRNA in lipid nanoparticles.

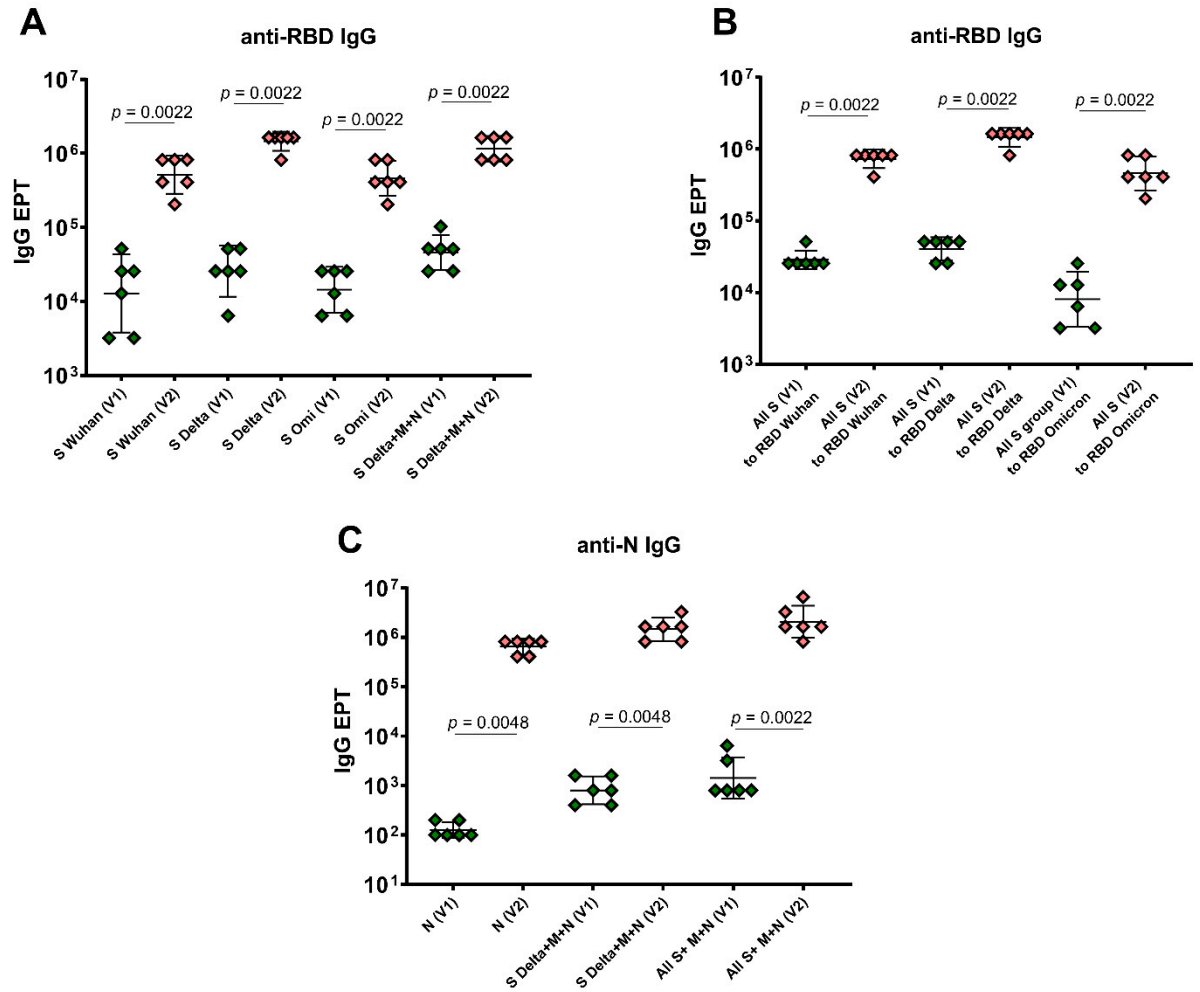

**Figure S3.** ELISA results for binding IgG after prime (V1) and boost (V2) vaccinations. Serum RBD-specific (A-B) and N- (C) binding IgG after prime (V1) and boost (V2) vaccinations. EPT values are represented as scatter dot plots in logarithmic scale. Lines represent geometric means with 95% confidence interval. Mann-Whitney test was used for statistical analysis.

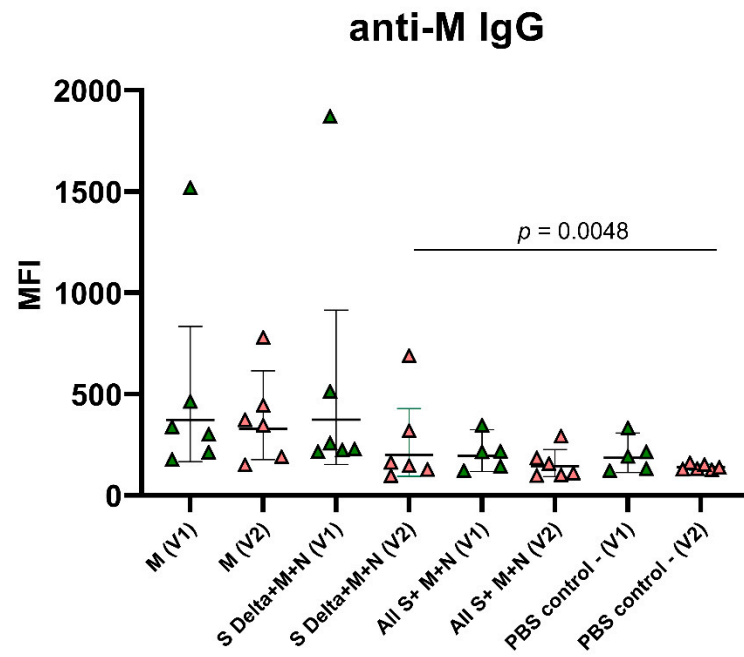

**Figure S4.** Bead-based immunoassay results for M-specific binding IgG after prime (V1) and boost (V2) vaccinations. MFI – median fluorescent intensity. Mann-Whitney test was used for statistical analysis.
